# Supplementary material for: Development of Clustered Resistance Gene Analogs-Based Markers of Resistance to Phytophthora capsici in Chili Pepper
Source: Biomed Res Int. 2019 Jan 3;2019:1093186. doi: 10.1155/2019/1093186 (PMC6335758; doi:10.1155/2019/1093186)
Supplement: Supplementary Materials — Supp. Table S1: plant materials used to validate the molecular markers in the study. Supp. Table S2: the information of the reanalyzed RGAs in this study. Supp. Table S3: sequence variation (SNPs) between resistant and susceptible plants in pepper varieties. [file 1093186.f1.xlsx]

## Sheet: Supp. Table S1
Supp. Table S1. Plant materials used to validate the molecular markers in the study.
Code	Cultivar	Generation	Phytophthora resistance	References
R1	CM334	Genetic resource	Resistant	[12, 42]
R2	PR Whanhosung	Commercial cultivars	Resistant	[43, 44]
R3	Kataguruma	Commercial cultivars	Resistant	[43, 44]
R4	Muhanjilju	Commercial cultivars	Resistant	[43, 44]
R5	PR power	Commercial cultivars	Resistant	[43, 44]
R6	Ilsongjung	Commercial cultivars	Resistant	[43]
R7	Dockyachungchung	Commercial cultivars	Resistant	[43]
R8	PR manidda	Commercial cultivars	Resistant	[43]
R9	PR wangmyeong (PR daechon)	Commercial cultivars	Resistant	[41]
R10	Gangreokjosaenggun	Commercial cultivars	Resistant	[41, 43]
R11	Ilpyeondansim	Commercial cultivars	Resistant	[44]; in this study
R12	AR legend	Commercial cultivars	Resistant	[44]; in this study
R13	Joseangace	Commercial cultivars	Resistant	[44]; in this study
R14	Gisedeungdeung	Commercial cultivars	Resistant	[44]; in this study
R15	Yeppeundockyachungchung	Commercial cultivars	Resistant	[44]; in this study
R16	Supergeumdang	Commercial cultivars	Resistant	[44]; in this study
R17	Meetingdaemokgochu	Commercial cultivars	Resistant	[44]; in this study
R18	Kumgangsuk	Commercial cultivars	Resistant	[44]; in this study
R19	Buldojang	Commercial cultivars	Resistant	[44]; in this study
R20	Mubyeongjidae	Commercial cultivars	Resistant	[44]; in this study
R21	Manmul	Commercial cultivars	Resistant	[44]; in this study
R22	Sinbi	Commercial cultivars	Resistant	[44]; in this study
R23	PR chungmyeong	Commercial cultivars	Resistant	[44]; in this study
R24	Mutanjidae	Commercial cultivars	Resistant	[44]; in this study
R25	Chungsung	Commercial cultivars	Resistant	[44]; in this study
R26	PBC280	Genetic resource	Resistant	[41]
R27	PR smart	Commercial cultivars	Resistant	[44]; in this study
R28	Bitgoeul	Commercial cultivars	Resistant	[44]; in this study
R29	PR poongnyeonga	Commercial cultivars	Resistant	[44]; in this study
R30	PR jeolsemiin	Commercial cultivars	Resistant	[44]; in this study
R31	PR everest	Commercial cultivars	Resistant	In this study
R32	Kanghantopstar	Commercial cultivars	Resistant	[44]; in this study
R33	PR chungyang	Commercial cultivars	Resistant	[44]; in this study
R34	Ansungmatchum	Commercial cultivars	Resistant	[44]; in this study
R35	E pungsunghan	Commercial cultivars	Resistant	In this study
R36	Cheonnyeonyaksok	Commercial cultivars	Resistant	In this study
R37	Kangchulhong	Commercial cultivars	Resistant	[44]; in this study
R38	PBC602	Genetic resource	Resistant	[41]
R39	Konesianhot	Commercial cultivars	Resistant	[44]; in this study
R40	Haemalgeungochu	Commercial cultivars	Resistant	[44]; in this study
R41	PI201234	Genetic resource	Resistant	[41]
R42	Tantandaemok	Commercial cultivars	Resistant	[41, 44]
R43	Jumping	Commercial cultivars	Resistant	In this study
R44	PBC495	Genetic resource	Resistant	[41]
MR1	PR mujeok	Commercial cultivars	Moderately resistant	[41]
MR2	Yeokkangsumunjang	Commercial cultivars	Moderately resistant	[41]
MR3	Yeokkanghongjanggun	Commercial cultivars	Moderately resistant	[41]
S1	NH4	Inbred	Susceptible	[41]
S2	Jeju	Landrace	Susceptible	[41]
S3	Daewhacho	Landrace	Susceptible	[41]
S4	Punggakcho	Landrace	Susceptible	[41]
S5	NB1	Inbred	Susceptible	[41]
S6	ECW30R	Inbred	Susceptible	[40]
S7	Nokgwang	Commercial cultivars	Susceptible	[44]; in this study
S8	NC1	Inbred	Susceptible	[41]
S9	Bukang	Commercial cultivars	Susceptible	[41]
S10	Super mannidda	Commercial cultivars	Susceptible	[41]
S11	Kumsugangsan	Commercial cultivars	Susceptible	[44]; in this study
S12	Matgwang	Commercial cultivars	Susceptible	[44]; in this study
S13	Chilsungcho	Landrace	Susceptible	[41]
S14	Daedeulbo	Commercial cultivars	Susceptible	[41]

## Sheet: Supp. Table S2
Supp. Table S2. The information of the re-analyzed RGAs in this study.
Gene ID		Marker	NLR type
1.5ver gene ID	1.55ver gene ID
CA05g03460	CA05g03990†	-	NBARC
CA05g03770	CA05g04300†	-	NBARC
CA05g04620	CA05g05390	CaNB-5390	NBARC
CA05g04640	CA05g05410	CaNB-5410	NBARC
CA05g04670	CA05g05440	CaNB-5440	NBARC
CA05g04710	CA05g05480	CaNB-5480	CNL
CA05g04730	CA05g05500	CaNB-5500	CNL
CA05g04740	CA05g05510		CNL
CA05g04950	CA05g05720	CaNB-5720	NBARC
CA05g05560	CA05g06330	CaNB-5330	CNL
CA05g05760	CA05g06530	CaNB-5530	CNL
CA05g06050	CA05g06820	-	CNL
CA05g06240	CA05g07170†	CaNB-5170	NL
CA05g06460	CA05g07390†	-	CC-NBARC
CA05g04980	CA05g05750	-	RLK
CA05g05620	CA05g06390	-	RLK
CA05g05700	CA05g06470†	CaRK-5470	RLK
CA05g05360	CA05g06130	CaRP-5130	RLP
18 RGAs were re-analyzed in this study. †Additional five RGAs were identified in this study. - : SNP were not detected these RGAs between C. annuum ‘CM334’ and C. annuum ‘Daepoongcho’.

## Sheet: Supp. Table S3
Supp. Table S3. Sequence variation (SNPs) between resistant and susceptible plants in pepper varieties.
Code†	Markers
	CaNB-5390		CaNB-5410		CaNB-5440		CaNB-5480		CaNB-5500		CaNB-5720		CaRP-5130		CaNB-5330		Phyto5SAR	CaRK-5470		CaNB-5530		142964	CaNB-5170
	Gen§	SNP	Gen	SNP	Gen	SNP	Gen	SNP	Gen	SNP	Gen	SNP	Gen	SNP	Gen	SNP	Gen	Gen	SNP	Gen	SNP	Gen	Gen	SNP
R1	R	T/T	R	G/G,G/G	R	G/G, C/C	R	T/T,T/T,G/G	R	T/T	R	A/A	R	A/A	R	C/C,G/G	R	R	G/G	R	C/C	R	R	A/A
R25	H	T/C	H	G/T, G/A	H	G/A, C/T	H	T/C,T/C,GA	H	T/G	S	G/G	H	A/G	H	C/T,G/A	H	R	G/G	H	C/T	H	R	A/A
R29	R	T/T	H	G/T, G/A	H	G/A, C/T	H	T/C,T/C,GA	H	T/G	S	G/G	H	A/G	H	C/T,G/A	H	H	G/A	H	C/T	S	H	A/C
R30	H	T/C	H	G/T, G/A	H	G/A, C/T	R	T/T,T/T,G/G	R	T/T	S	G/G	H	A/G	H	C/T,G/A	H	H	G/A	H	C/T	S	H	A/C
R31	H	T/C	H	G/T, G/A	H	G/A, C/T	H	T/C,T/C,GA	H	T/G	S	G/G	H	A/G	H	C/T,G/A	-	H	G/A	H	C/T	S	R	A/A
R20	R	T/T	H	G/T, G/A	H	G/A, C/T	R	T/T,T/T,G/G	R	T/T	H	A/G	R	A/A	R	C/C,G/G	R	H	G/A	R	C/C	S	H	A/C
R40	S	C/C	H	G/T, G/A	H	G/A, C/T	S	C/C,C/C,AA	S	G/G	R	A/A	H	A/G	H	C/T,G/A	H	S	A/A	H	C/T	H	H	A/C
R3	R	T/T	S	T/T, A/A	H	G/A, C/T	R	T/T,T/T,G/G	R	T/T	R	A/A	R	A/A	H	C/T,G/A	H	R	G/G	R	C/C	S	H	A/C
R2	R	T/T	H	G/T, G/A	S	A/A, T/T	H	T/C,T/C,G/A	H	T/G	R	A/A	H	A/G	H	C/T,G/A	H	R	G/G	H	C/T	S	S	C/C
R4	R	T/T	H	G/T, G/A	S	A/A, T/T	H	T/C,T/C,G/A	H	T/G	H	A/G	H	A/G	H	C/T,G/A	H	R	G/G	H	C/T	S	S	C/C
R5	H	T/C	H	G/T, G/A	S	A/A, T/T	H	T/C,T/C,G/A	H	T/G	H	A/G	H	A/G	H	C/T,G/A	H	R	G/G	H	C/T	H	H	A/C
R6	R	T/T	H	G/T, G/A	S	A/A, T/T	H	T/C,T/C,G/A	H	T/G	H	A/G	H	A/G	H	C/T,G/A	H	R	G/G	H	C/T	S	S	C/C
R7	R	T/T	H	G/T, G/A	S	A/A, T/T	H	T/C,T/C,G/A	H	T/G	H	A/G	H	A/G	H	C/T,G/A	H	R	G/G	H	C/T	S	S	C/C
R8	H	T/C	H	G/T, G/A	S	A/A, T/T	H	T/C,T/C,G/A	H	T/G	H	A/G	H	A/G	H	C/T,G/A	H	R	G/G	H	C/T	H	S	C/C
R9	H	T/C	H	G/T, G/A	S	A/A, T/T	H	T/C,T/C,G/A	H	T/G	H	A/G	H	A/G	H	C/T,G/A	H	R	G/G	H	C/T	S	S	C/C
R10	H	T/C	H	G/T, G/A	S	A/A, T/T	H	T/C,T/C,G/A	H	T/G	H	A/G	H	A/G	H	C/T,G/A	H	R	G/G	H	C/T	H	H	A/C
R35	R	T/T	H	G/T, G/A	S	A/A, T/T	H	T/C,T/C,G/A	H	T/G	R	A/A	-	-	R	C/C,G/G	S	R	G/G	H	C/T	S	H	A/C
R17	R	T/T	H	G/T, G/A	S	A/A, T/T	R	T/T,T/T,G/G	R	T/T	R	A/A	R	A/A	H	C/T,G/A	R	H	G/A	H	C/T	H	H	A/C
R37	H	T/C	H	G/T, G/A	S	A/A, T/T	H	T/C,T/C,G/A	H	T/G	S	G/G	S	G/G	R	C/C,G/G	S	S	A/A	S	T/T	H	H	A/C
R32	H	T/C	H	G/T, G/A	S	A/A, T/T	H	T/C,T/C,G/A	H	T/G	S	G/G	H	A/G	R	C/C,G/G	S	S	A/A	S	T/T	H	H	A/C
R27	S	C/C	S	T/T, A/A	S	A/A, T/T	R	T/T,T/T,G/G	R	T/T	S	G/G	H	A/G	H	C/T,G/A	H	H	G/A	H	C/T	S	S	C/C
R38	S	C/C	R	G/G,G/G	S	A/A, T/T	R	T/T,T/T,G/G	S	G/G	H	A/G	R	A/A	S	T/T,A/A	R	R	G/G	R	C/C	R	R	A/A
R26	S	C/C	R	G/G,G/G	S	A/A, T/T	R	T/T,T/T,G/G	R	T/T	S	G/G	R	A/A	R	C/C,G/G	R	R	G/G	R	C/C	S	S	C/C
R34	S	C/C	H	G/T, G/A	S	A/A, T/T	H	T/C,T/C,G/A	H	T/G	S	G/G	H	A/G	S	T/T,A/A	H	H	G/A	H	C/T	R	H	A/C
R36	S	C/C	H	G/T, G/A	S	A/A, T/T	H	T/C,T/C,G/A	H	T/G	S	G/G	S	G/G	H	C/T,G/A	S	S	A/A	S	T/T	H	H	A/C
R28	S	C/C	H	G/T, G/A	S	A/A, T/T	H	T/C,T/C,G/A	H	T/G	S	G/G	H	A/G	H	C/T,G/A	H	H	G/A	H	C/T	S	S	C/C
R44	R	T/T	R	G/G,G/G	S	A/A, T/T	S	C/C,C/C,AA	S	G/G	H	A/G	S	G/G	R	C/C,G/G	R	R	G/G	R	C/C	R	S	C/C
R42	H	T/C	H	G/T, G/A	S	A/A, T/T	S	C/C,C/C,AA	S	G/G	H	A/G	R	A/A	S	T/T,A/A	H	R	G/G	R	C/C	R	S	C/C
R21	H	T/C	S	T/T, A/A	S	A/A, T/T	H	T/C,T/C,G/A	H	T/G	R	A/A	H	A/G	H	C/T,G/A	H	H	G/A	H	C/T	H	H	A/C
R22	H	T/C	S	T/T, A/A	S	A/A, T/T	H	T/C,T/C,G/A	H	T/G	R	A/A	H	A/G	H	C/T,G/A	H	R	G/G	H	C/T	H	H	A/C
R16	H	T/C	S	T/T, A/A	S	A/A, T/T	R	T/T,T/T,G/G	R	T/T	R	A/A	R	A/A	H	C/T,G/A	H	H	G/A	R	C/C	R	S	C/C
R18	R	T/T	S	T/T, A/A	S	A/A, T/T	R	T/T,T/T,G/G	R	T/T	R	A/A	H	A/G	H	C/T,G/A	H	H	G/A	H	C/T	H	S	C/C
R33	H	T/C	S	T/T, A/A	S	A/A, T/T	R	T/T,T/T,G/G	R	T/T	R	A/A	H	A/G	R	C/C,G/G	S	H	G/A	S	T/T	R	S	C/C
R11	H	T/C	S	T/T, A/A	S	A/A, T/T	R	T/T,T/T,G/G	R	T/T	R	A/A	H	A/G	H	C/T,G/A	H	H	G/A	H	C/T	S	S	C/C
R12	H	T/C	S	T/T, A/A	S	A/A, T/T	R	T/T,T/T,G/G	R	T/T	R	A/A	H	A/G	H	C/T,G/A	H	H	G/A	H	C/T	S	S	C/C
R13	H	T/C	S	T/T, A/A	S	A/A, T/T	R	T/T,T/T,G/G	R	T/T	R	A/A	H	A/G	H	C/T,G/A	H	H	G/A	H	C/T	S	S	C/C
R14	H	T/C	S	T/T, A/A	S	A/A, T/T	R	T/T,T/T,G/G	R	T/T	R	A/A	R	A/A	H	C/T,G/A	H	H	G/A	H	C/T	S	S	C/C
R15	H	T/C	S	T/T, A/A	S	A/A, T/T	R	T/T,T/T,G/G	R	T/T	R	A/A	R	A/A	H	C/T,G/A	H	H	G/A	H	C/T	S	S	C/C
R19	H	T/C	S	T/T, A/A	S	A/A, T/T	R	T/T,T/T,G/G	R	T/T	R	A/A	R	A/A	H	C/T,G/A	H	H	G/A	H	C/T	S	S	C/C
R23	H	T/C	S	T/T, A/A	S	A/A, T/T	R	T/T,T/T,G/G	R	T/T	R	A/A	R	A/A	H	C/T,G/A	H	H	G/A	H	C/T	S	S	C/C
R24	H	T/C	S	T/T, A/A	S	A/A, T/T	R	T/T,T/T,G/G	R	T/T	R	A/A	R	A/A	H	C/T,G/A	R	S	A/A	R	C/C	S	S	C/C
R39	H	T/C	S	T/T, A/A	S	A/A, T/T	S	C/C,C/C,AA	R	T/T	S	G/G	H	A/G	H	C/T,G/A	H	R	G/G	S	T/T	R	R	A/A
R43	H	T/C	S	T/T, A/A	S	A/A, T/T	S	C/C,C/C,AA	S	G/G	S	G/G	H	A/G	S	T/T,A/A	S	S	A/A	S	T/T	H	H	A/C
R41	S	CC	S	T/T, A/A	S	A/A, T/T	S	C/C,C/C,AA	S	G/G	R	A/A	R	A/A	S	T/T,A/A	R	R	G/G	R	C/C	R	-	-
MR1	H	T/C	R	G/G,G/G	H	G/A, C/T	H	T/C,T/C,G/A	H	T/G	H	A/G	H	A/G	H	C/T,G/A	H	R	G/G	H	C/T	H	-	-
MR2	H	T/C	H	G/T, G/A	H	G/A, C/T	R	T/T,T/T,G/G	R	T/T	H	A/G	H	A/G	H	C/T,G/A	H	R	G/G	H	C/T	S	H	A/C
MR3	H	T/C	H	G/T, G/A	H	G/A, C/T	R	T/T,T/T,G/G	R	T/T	H	A/G	H	A/G	H	C/T,G/A	H	R	G/G	H	C/T	S	H	A/C
S11	S	C/C	S	T/T, A/A	S	A/A, T/T	S	C/C,C/C,AA	H	T/G	S	G/G	S	G/G	H	C/T,G/A	S	H	G/A	S	T/T	S	S	C/C
S13	S	C/C	S	T/T, A/A	S	A/A, T/T	R	T/T,T/T,G/G	R	T/T	S	G/G	S	G/G	S	T/T,A/A	S	S	A/A	S	T/T	S	S	C/C
S12	S	C/C	S	T/T, A/A	R	G/G, C/C	S	C/C,C/C,AA	H	T/G	S	G/G	R	A/A	H	C/T,G/A	S	R	G/G	R	C/C	H	S	C/C
S7	S	C/C	H	G/T, G/A	H	G/A, C/T	S	C/C,C/C,AA	S	G/G	S	G/G	R	A/A	S	T/T,A/A	S	H	G/A	R	C/C	S	S	C/C
S8	S	C/C	R	G/G,G/G	S	A/A, T/T	S	C/C,C/C,AA	S	G/G	H	A/G	R	A/A	S	T/T,A/A	S	H	G/A	R	C/C	R	S	C/C
S4	S	C/C	R	G/G,G/G	S	A/A, T/T	S	C/C,C/C,AA	S	G/G	H	A/G	S	G/G	S	T/T,A/A	S	R	G/G	S	T/T	R	-	-
S10	S	C/C	R	G/G,G/G	S	A/A, T/T	S	C/C,C/C,AA	S	G/G	H	A/G	R	A/A	H	C/T,G/A	S	R	G/G	H	C/T	R	H	A/C
S14	S	C/C	-	-	S	A/A, T/T	H	T/C,T/C,G/A	H	T/G	H	A/G	-	-	S	T/T,A/A	S	R	G/G	S	T/T	H	H	A/C
S9	H	T/C	H	G/T, G/A	S	A/A, T/T	S	C/C,C/C,AA	S	G/G	S	G/G	R	A/A	H	C/T,G/A	S	H	G/A	S	T/T	H	H	A/C
S6	R	T/T	S	T/T, A/A	S	A/A, T/T	S	C/C,C/C,AA	S	G/G	S	G/G	R	A/A	S	T/T,A/A	S	S	A/A	R	C/C	R	R	A/A
S2	R	T/T	S	T/T, A/A	S	A/A, T/T	S	C/C,C/C,AA	S	G/G	R	A/A	S	G/G	S	T/T,A/A	S	S	A/A	S	T/T	R	S	C/C
S1	R	T/T	S	T/T, A/A	S	A/A, T/T	S	C/C,C/C,AA	S	G/G	H	A/G	S	G/G	S	T/T,A/A	S	H	G/A	S	T/T	R	S	C/C
S3	R	T/T	S	T/T, A/A	S	A/A, T/T	S	C/C,C/C,AA	S	G/G	H	A/G	S	G/G	S	T/T,A/A	S	R	G/G	S	T/T	R	-	-
S5	R	T/T	S	T/T, A/A	S	A/A, T/T	S	C/C,C/C,AA	S	G/G	H	A/G	S	G/G	R	C/C,G/G	S	H	G/A	S	T/T	R	S	C/C
Co-segregation genotypes are indicated by gray; white color indicates recombinant genotypes. R: resistant homozygote, H: resistant heterozygote, S: susceptible homozygote, -: not detected. †accession name is shown on Table S1. §Subscribed about the genotype.
